# Supplementary material for: The School Malaise Trap Program: Coupling educational outreach with scientific discovery
Source: PubMed Central journal article supplement (PMC5402927; doi:10.1371/journal.pbio.2001829), 2017-04-24
Supplement: pbio.2001829.s001.pdf [file pbio.2001829.s001.pdf]

## Collection Records Spreadsheet

Teachers should keep a record of scientifically significant events (i.e. date, weather information, catch volumes observed, and incidence of trap disturbance) on the spreadsheet provided here. This record should be submitted along with the specimen collection bottles and the trap at the end of the collection period. These records sheets may be hung up in the classroom as a tool for student engagement throughout the deployment period.

**EXAMPLE:**

|               | Date                 | High Temp. (°C) | Cloud Cover (%)     | Catch Volume                | Notes (eg. trap disturbance)                                                       |
|---------------|----------------------|-----------------|---------------------|-----------------------------|------------------------------------------------------------------------------------|
| <b>Week 1</b> | Monday, September 19 | 19°C            | Partly cloudy (50%) | Below line 1 (~20 insects)* | Trap collapsed at back, had to re-secure. Specimen collection bottle appears fine. |

*\*Indicate rough count of specimens only if the volume falls below the first tick line*

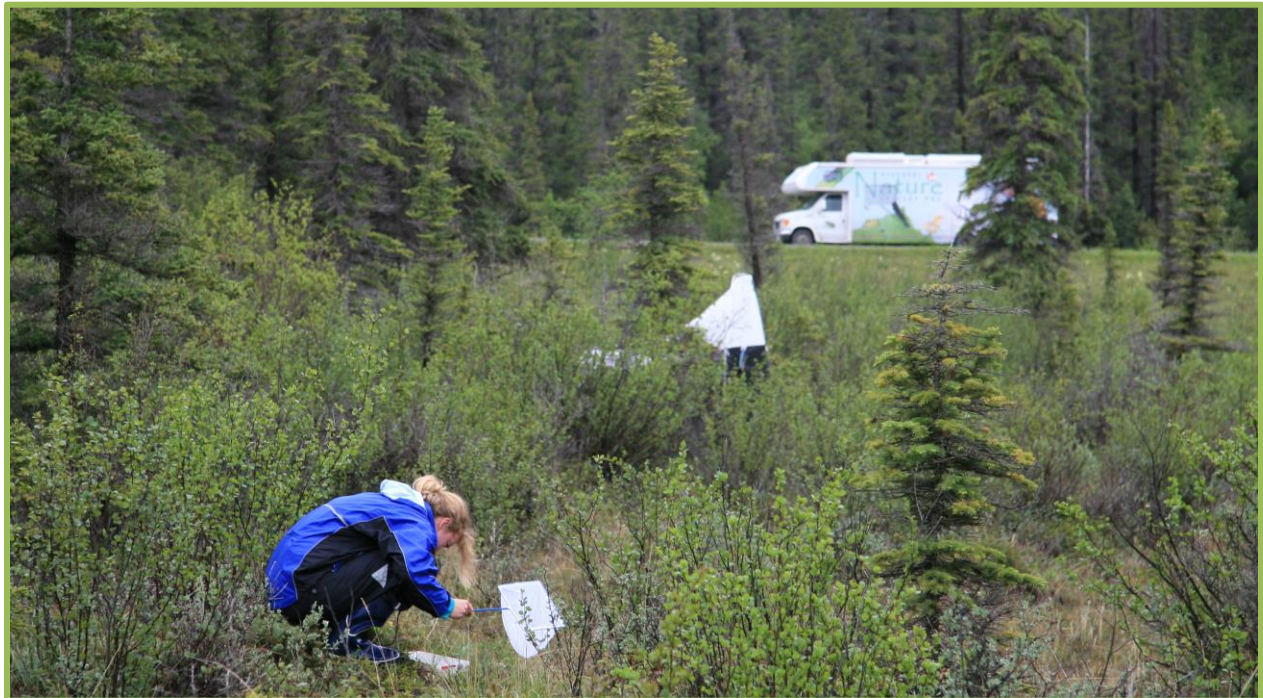

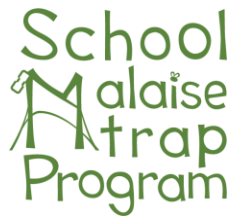

## Collection Records Spreadsheet

Trap # (i.e. EQP-CLL#): \_\_\_\_\_

School: \_\_\_\_\_

Teacher: \_\_\_\_\_

|                                             | Date                    | Daily High Temp. (°C) | Cloud Cover (%) | Catch Volume | Notes (e.g. trap disturbance) |
|---------------------------------------------|-------------------------|-----------------------|-----------------|--------------|-------------------------------|
| <b>Week 1<br/>(September 19 – 23, 2016)</b> | Monday, September 19    |                       |                 |              |                               |
|                                             | Tuesday, September 20   |                       |                 |              |                               |
|                                             | Wednesday, September 21 |                       |                 |              |                               |
|                                             | Thursday, September 22  |                       |                 |              |                               |
|                                             | Friday, September 23    |                       |                 |              |                               |
| <b>Week 2<br/>(September 26 – 30, 2016)</b> | Monday, September 26    |                       |                 |              |                               |
|                                             | Tuesday, September 27   |                       |                 |              |                               |
|                                             | Wednesday, September 28 |                       |                 |              |                               |
|                                             | Thursday, September 29  |                       |                 |              |                               |
|                                             | Friday, September 30    |                       |                 |              |                               |
